# Supplementary material for: Nicastrin and Notch4 drive endocrine therapy resistance and epithelial to mesenchymal transition in MCF7 breast cancer cells
Source: PubMed Central journal article supplement (PMC4095694; doi:10.1186/bcr3675), 2014-06-11

**S3A**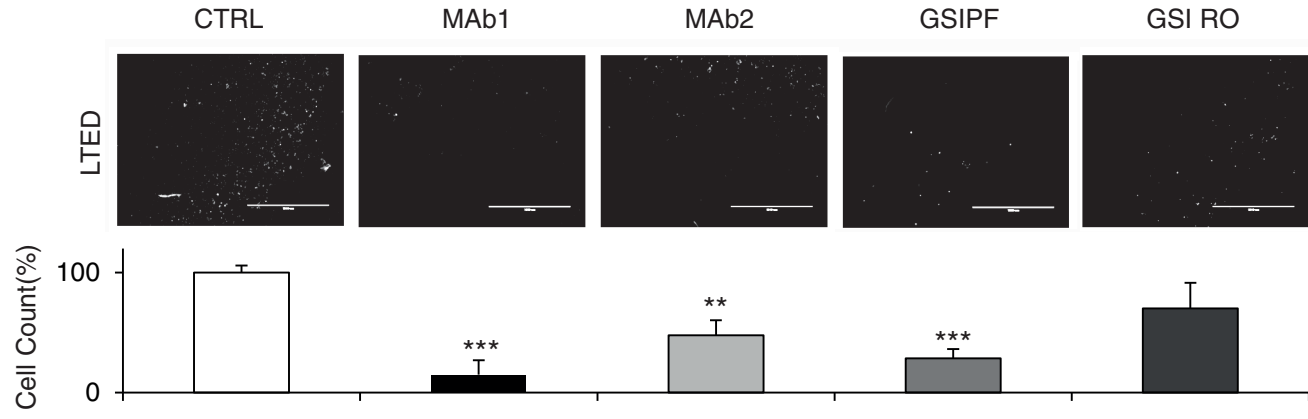**S3B**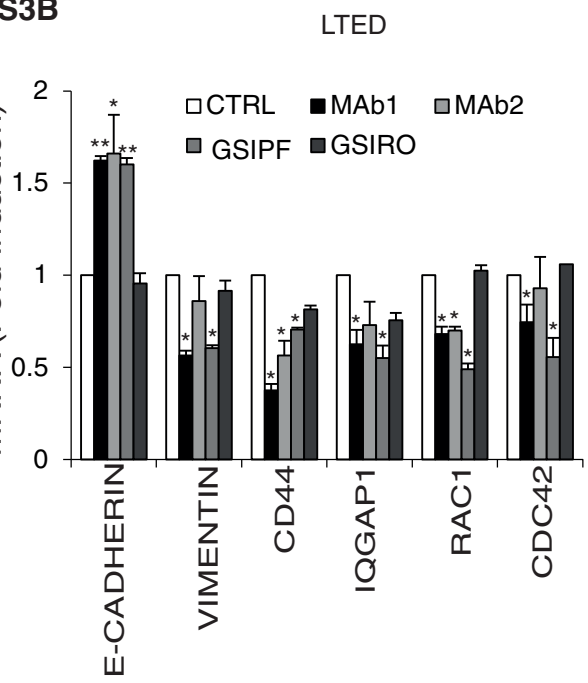**S3C**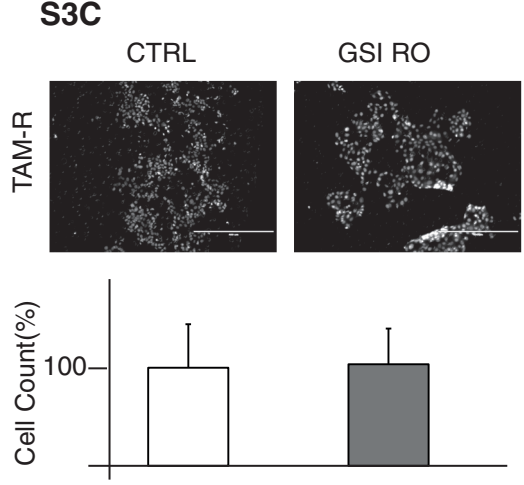**S3D**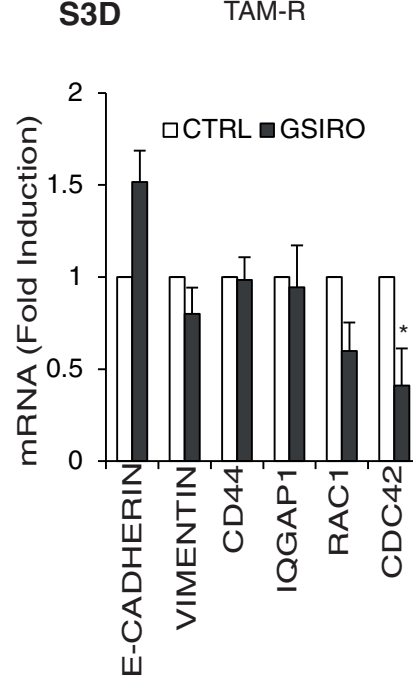**S3E**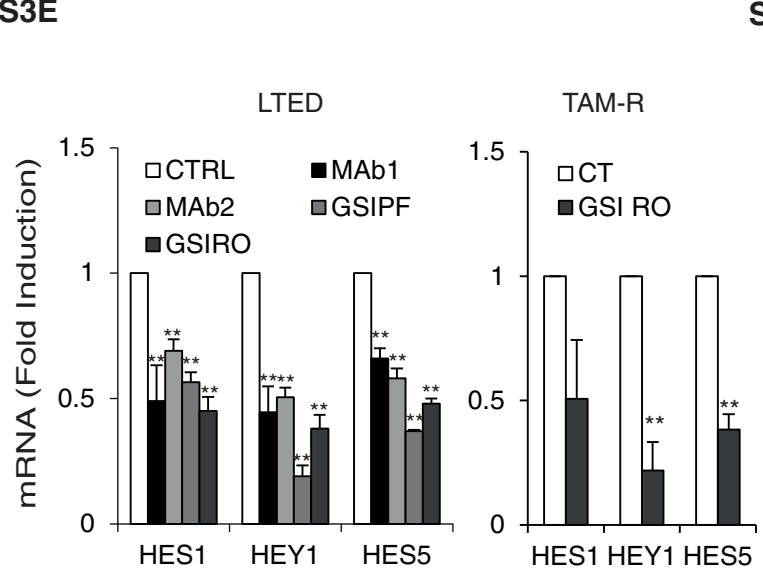**S3F**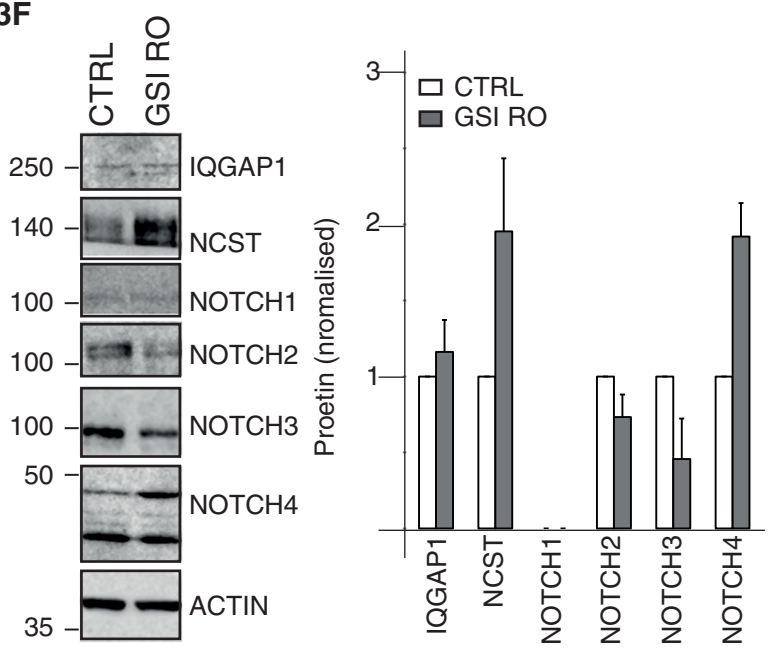

Supplement: bcr3675-S4.pdf [file bcr3675-S4.pdf]
