# Supplementary material for: Nicastrin and Notch4 drive endocrine therapy resistance and epithelial to mesenchymal transition in MCF7 breast cancer cells
Source: PubMed Central journal article supplement (PMC4095694; doi:10.1186/bcr3675), 2014-06-11

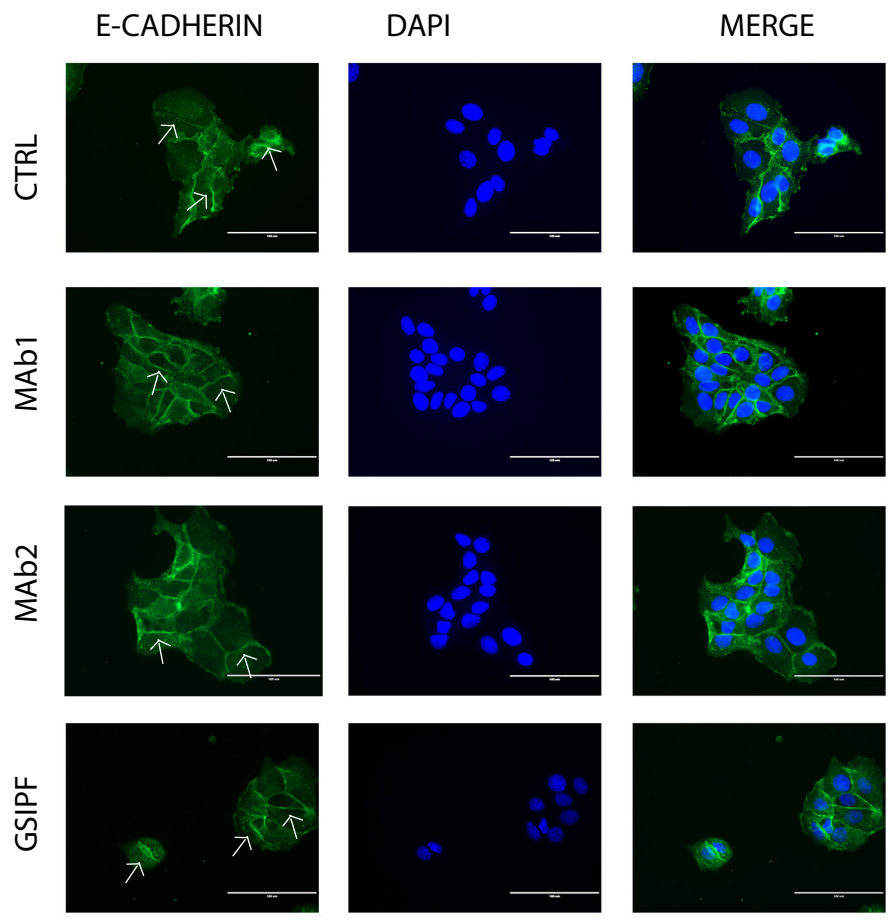

Supplement: bcr3675-S5.pdf [file bcr3675-S5.pdf]
